# Supplementary material for: Evaluation and degradation mechanism of phthalimide derivatives as anolytes for non-aqueous organic static batteries
Source: Royal Society of Chemistry journal article supplement (doi:10.1039/d2nj03495f), 2022-01-01
Supplement: d2nj03495f1.pdf [file d2nj03495f1.pdf]

## Evaluation and Degradation Mechanism of Phthalimide Derivatives as Anolyte for Non-Aqueous Organic Static Battery

Noufal Merukan Chola<sup>1,2</sup>, Rajaram K. Nagarale<sup>1,2\*</sup>

<sup>1</sup>Membrane Science and Separation Technology Division, CSIR-Central Salt and Marine Chemicals Research Institute, Bhavnagar, 364002 Gujarat, India.

<sup>2</sup>Academy of Scientific and Innovative Research (AcSIR), Ghaziabad- 201002, India

### Supplementary Information

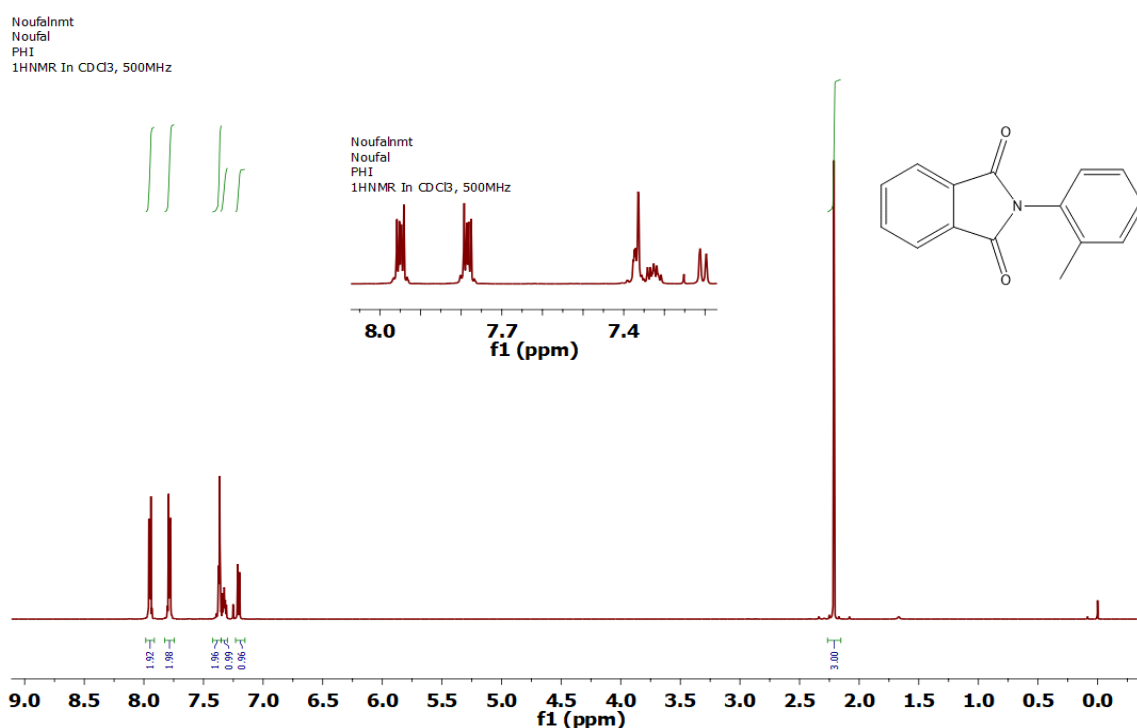

Figure S1. <sup>1</sup>H NMR of 2-methylphthalimide derivative

Noufalnmt  
Noufal  
PHI  
13C NMR In CDCl3, 500MHz

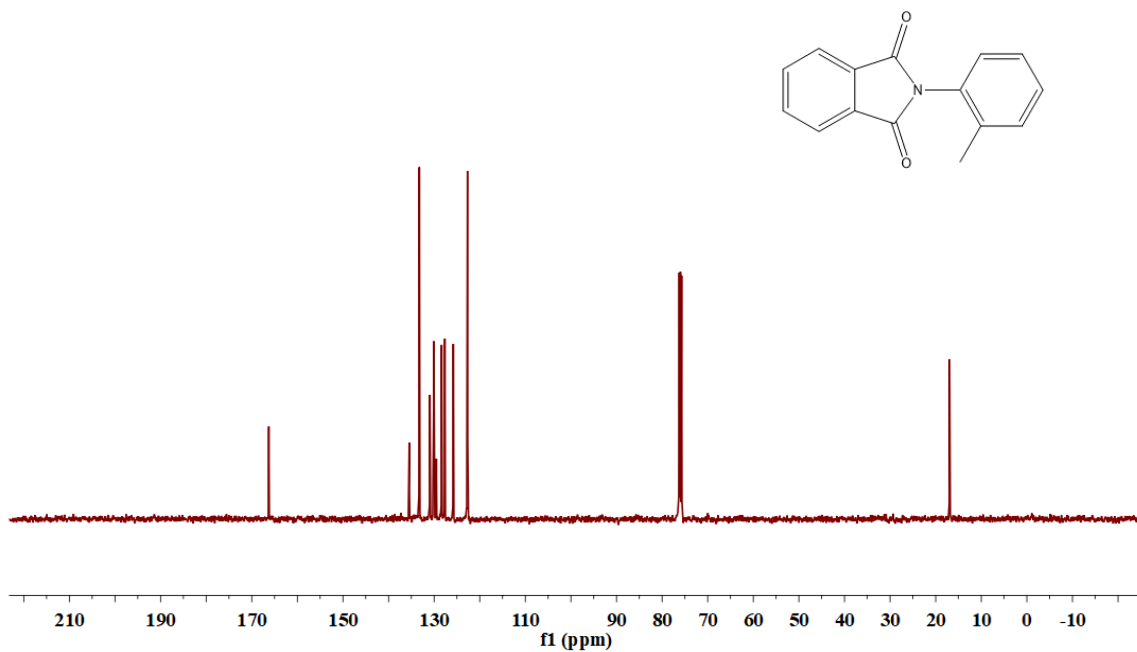

Figure S2. 13C NMR of 2-methylphthalimide derivative

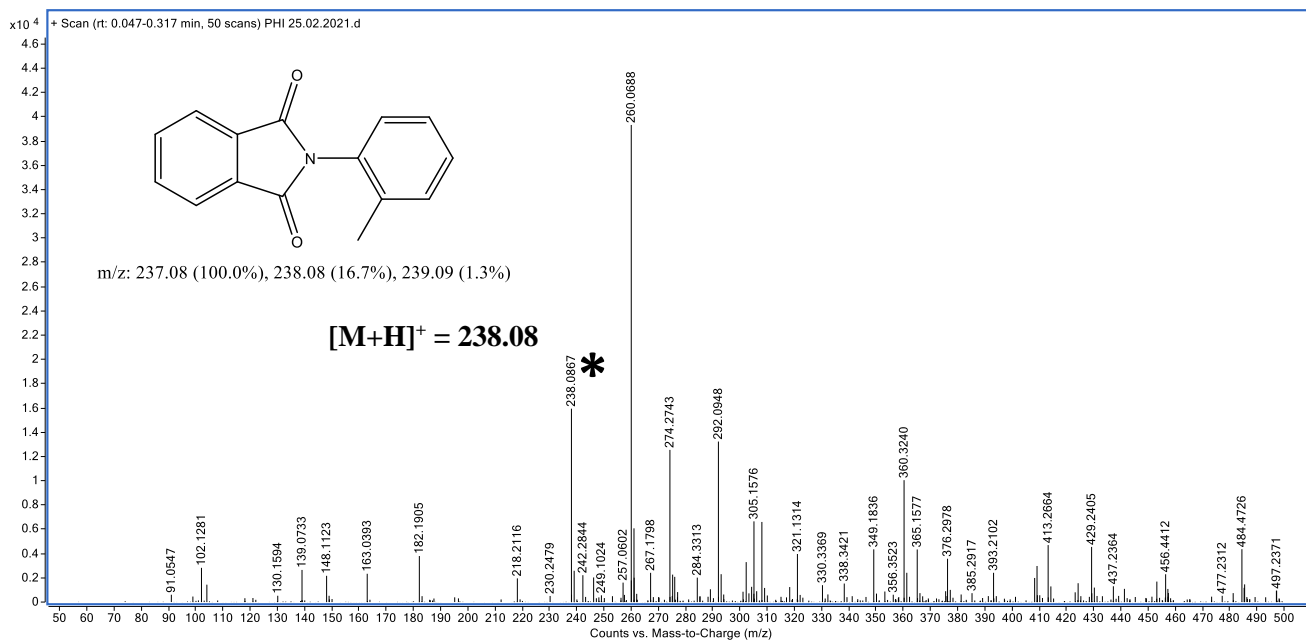

Figure S3. LCMS-ESI of 2-methylphthalimide derivative

Noufal  
Noufal  
PHI NO2  
1H NMR In CDCl3, 500MHz

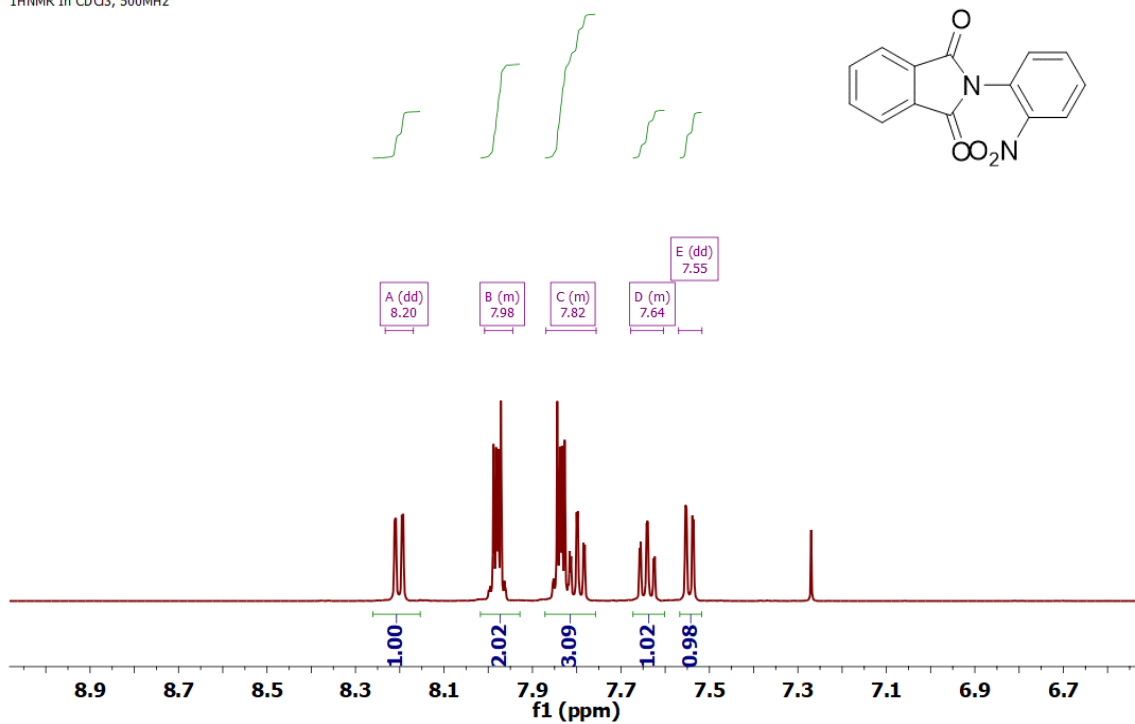

Figure S4. 1H NMR of 2-nitrothalimide derivative

Noufal  
Noufal  
PHI NO2  
13C NMR In CDCl3, 500MHz

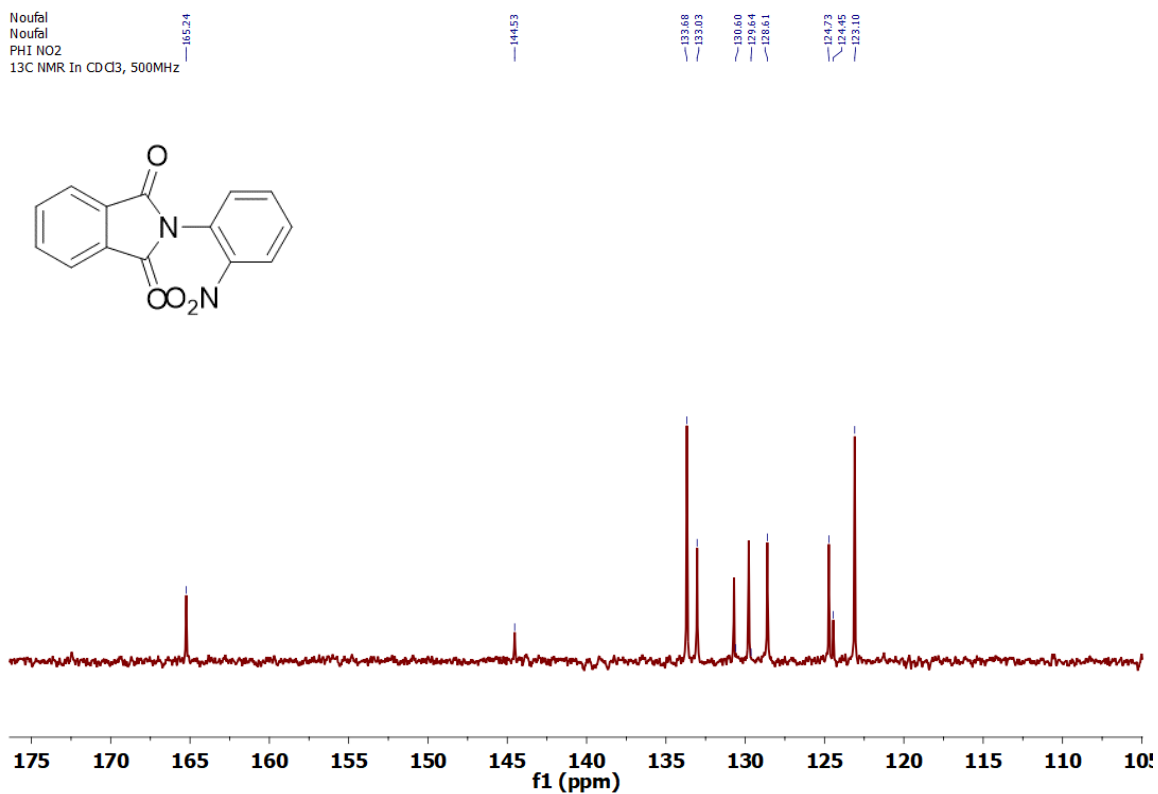

Figure S5. 13C NMR of 2-nitrothalimide derivative

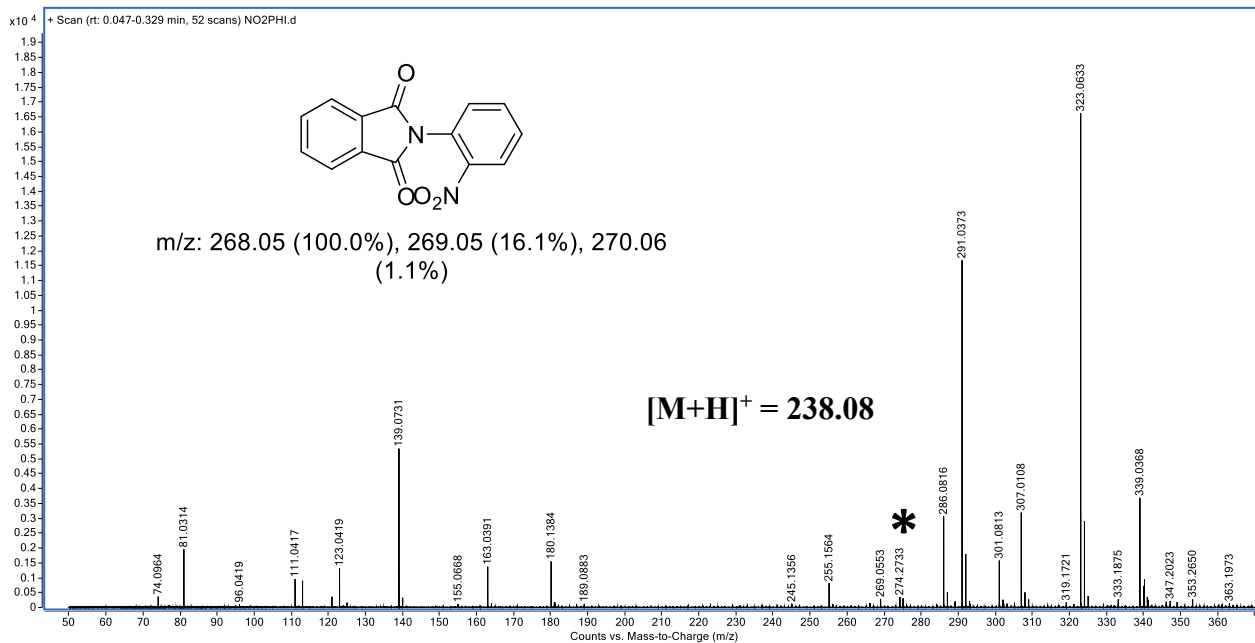

Figure S6. LCMS-ESI of 2-nitrophenylphthalimide derivative

Noufal  
Noufal  
EthyIPHI  
1HNMR In CDCl<sub>3</sub>, 500MHz

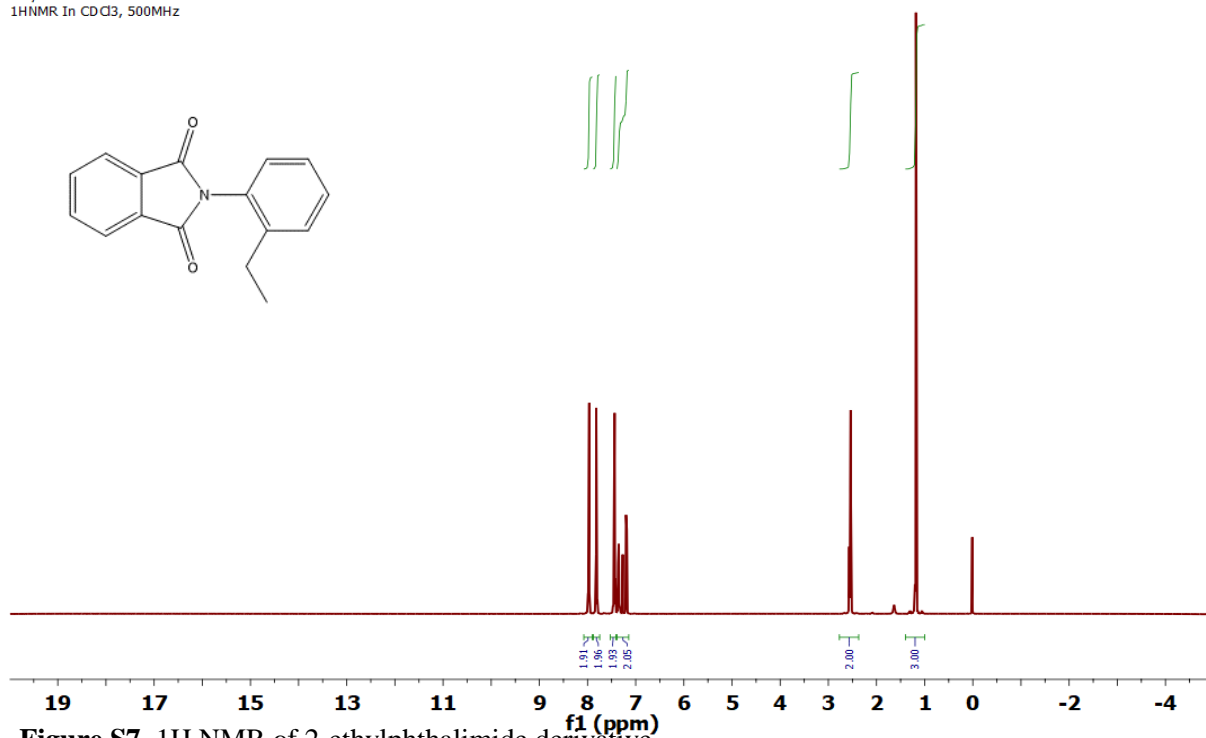

Figure S7. <sup>1</sup>H NMR of 2-ethylphenylphthalimide derivative

Noufal  
Noufal  
EthyIPHI  
13C NMR In CDCl3, 500MHz

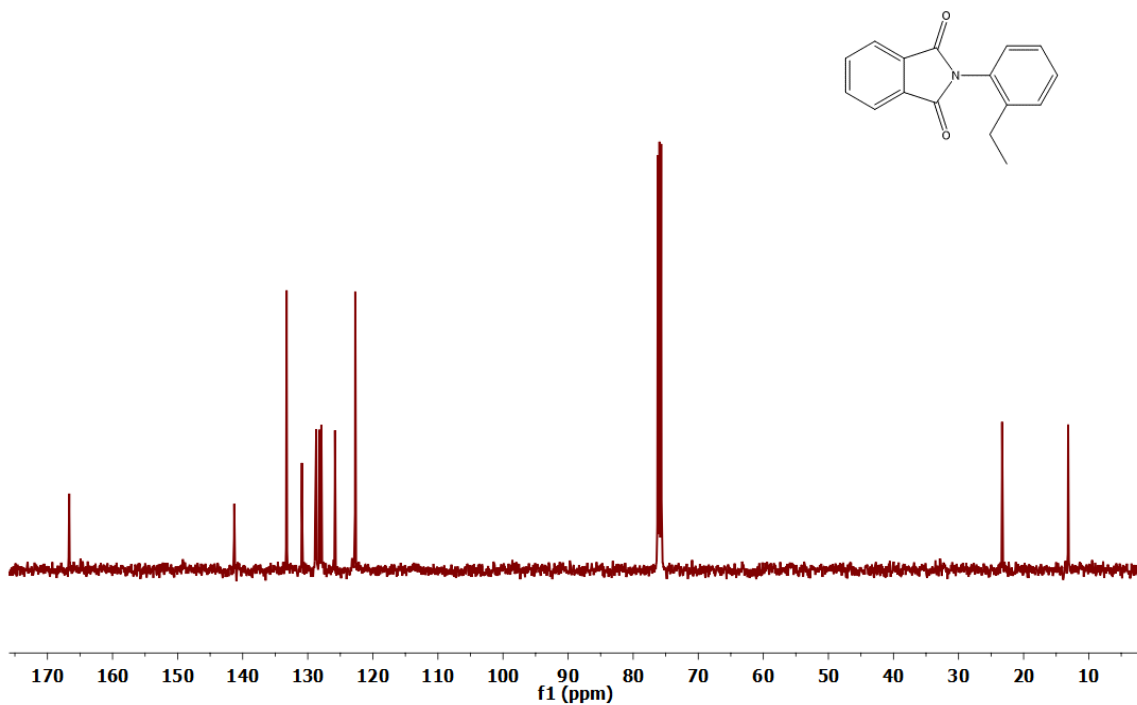

Figure S8. <sup>13</sup>C NMR of 2-ethylphthalimide derivative

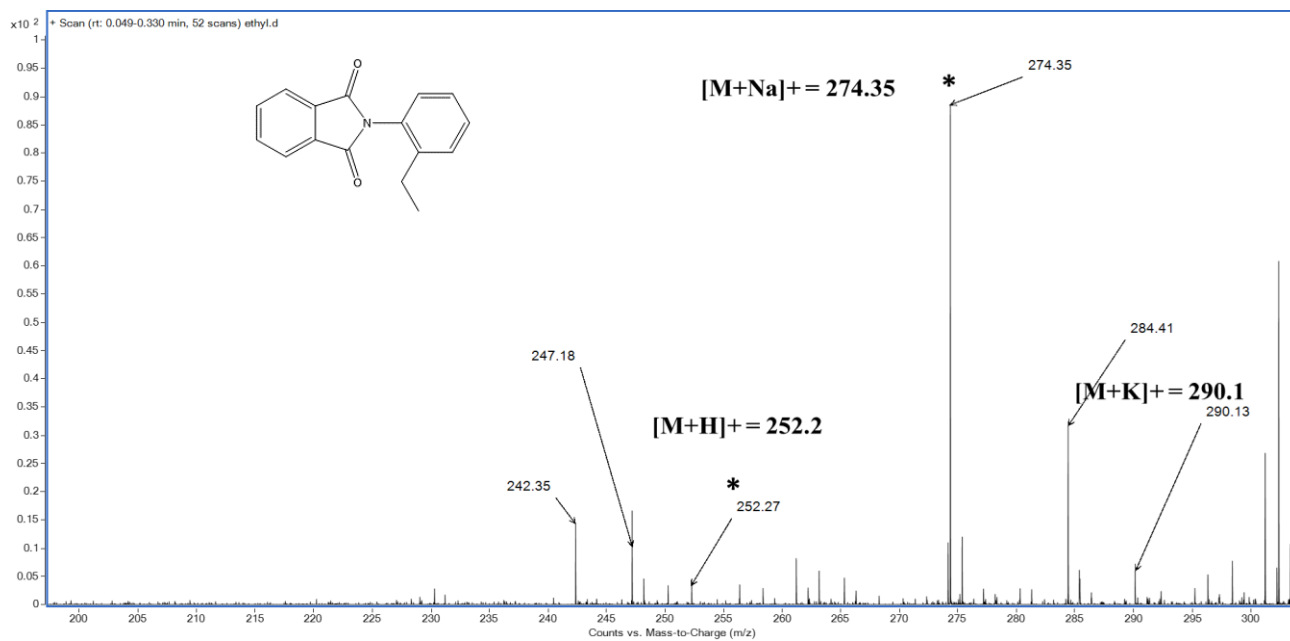

Figure S9. LCMS-ESI mass spectrum 2-Ethylphthalimide

Noufal  
Noufal

**<sup>1</sup>H NMR In CDCl<sub>3</sub>, 500MHz**

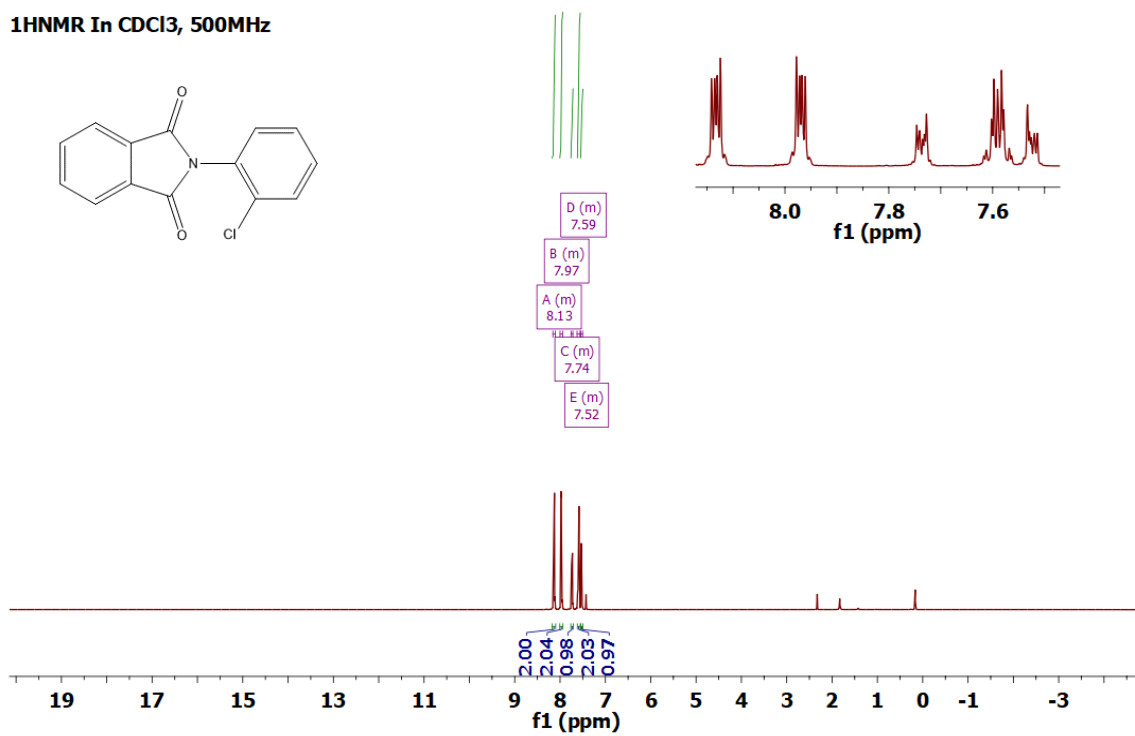

**Figure S10.** <sup>1</sup>H NMR of 2-chlorophthalimide derivative

Noufal  
Noufal  
PidCL  
**<sup>13</sup>C NMR In CDCl<sub>3</sub>, 500MHz**

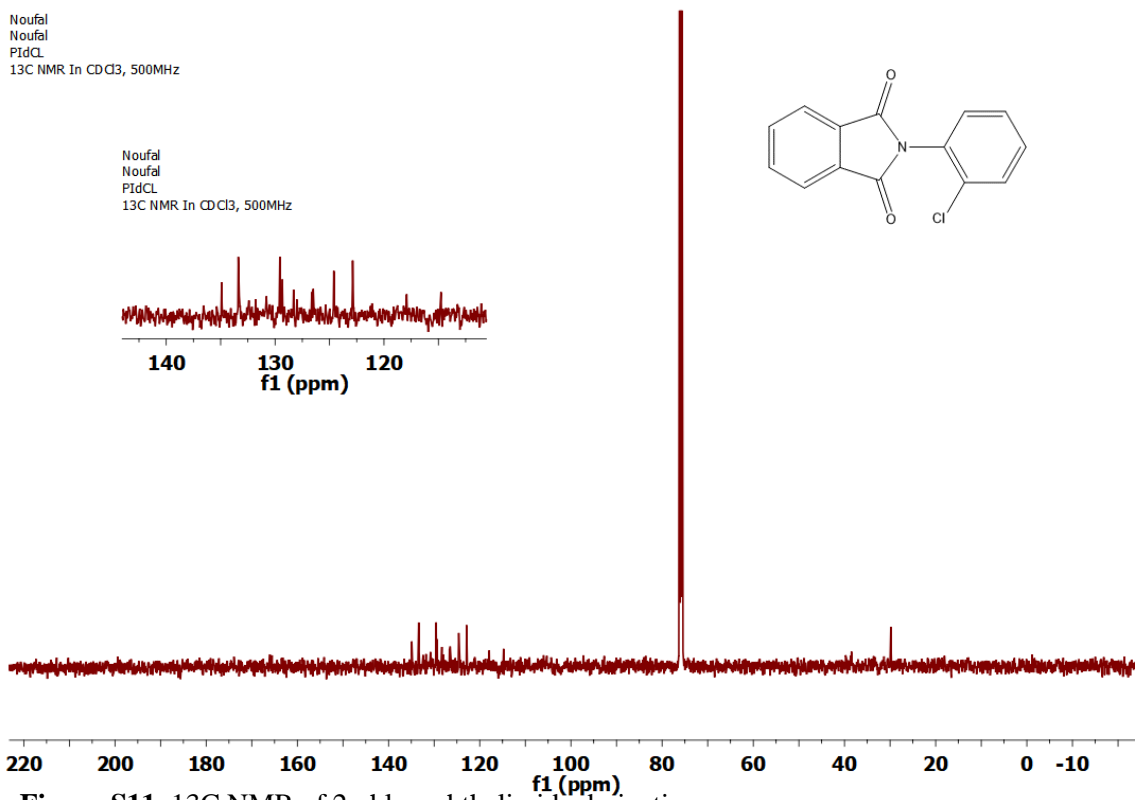

**Figure S11.** <sup>13</sup>C NMR of 2-chlorophthalimide derivative

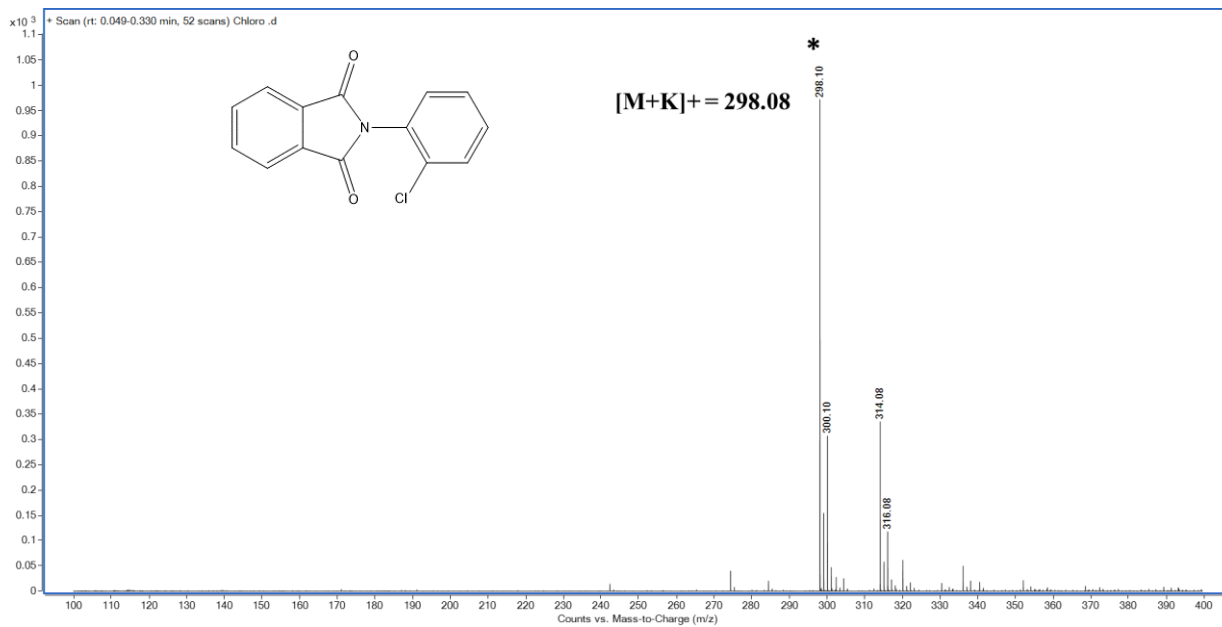

**Figure S12.** LCMS-ESI 2-chlorophthalimide derivative

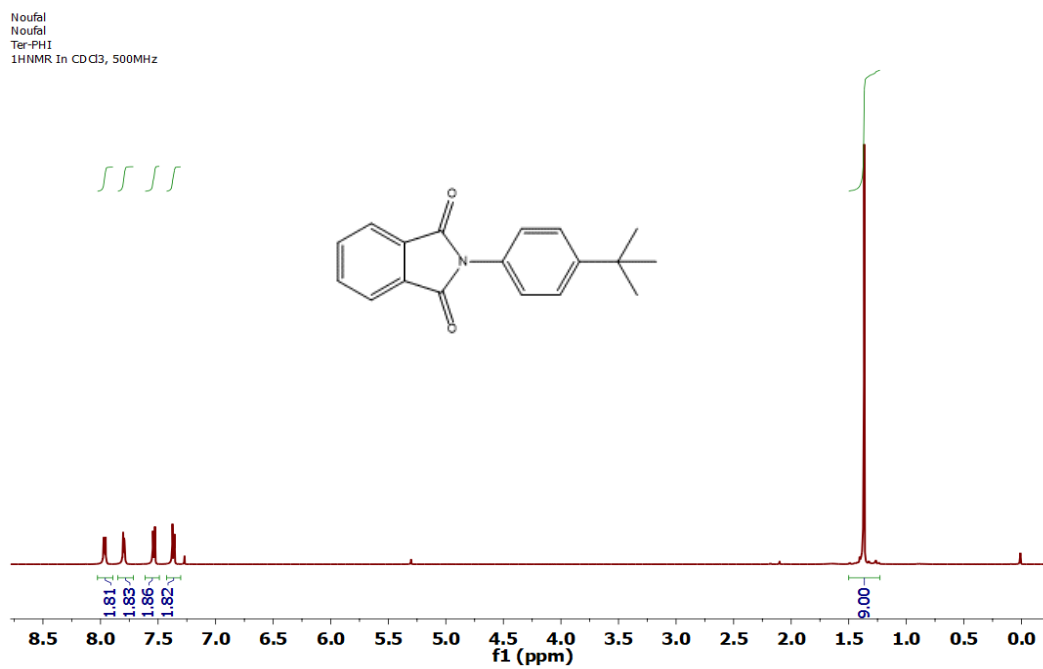

**Figure S13.** 1H NMR of 4-Tertiarybutylphthalimide derivative

Noufal  
Noufal  
Ter-PHI  
13C NMR In CDCl3, 500MHz

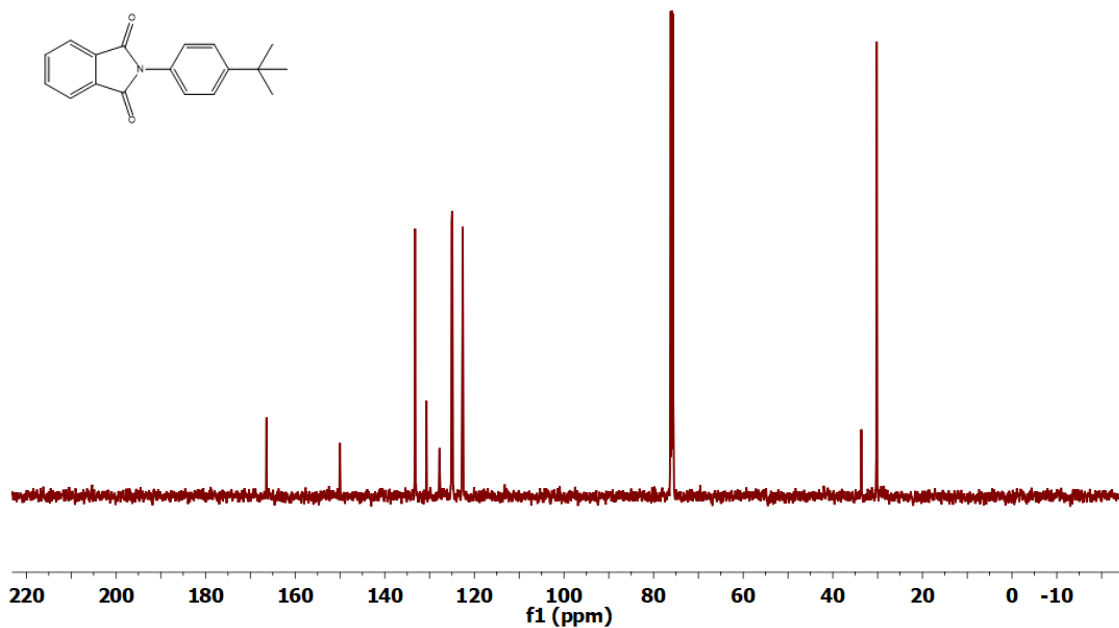

Figure S14. <sup>13</sup>C NMR of 4-Tertiarybutylphthalimide derivative

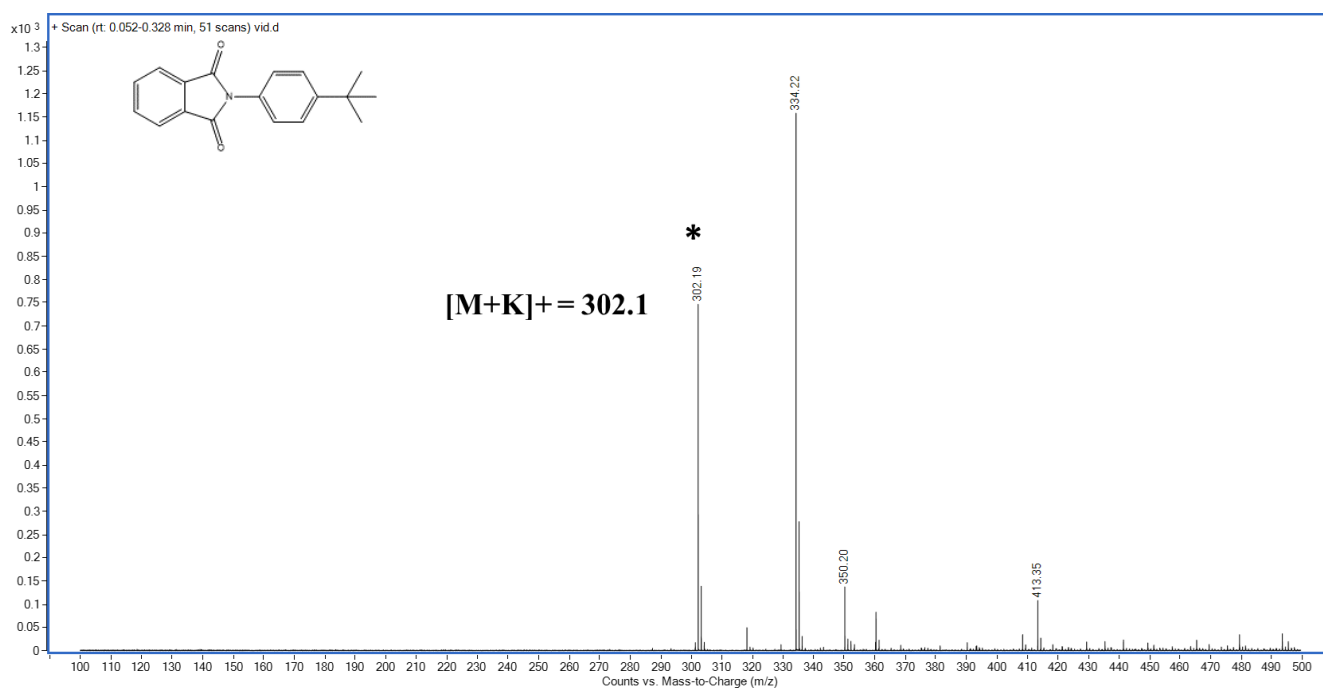

Figure S15. LCMS-ESI of 4-Tertiarybutylphthalimide derivative



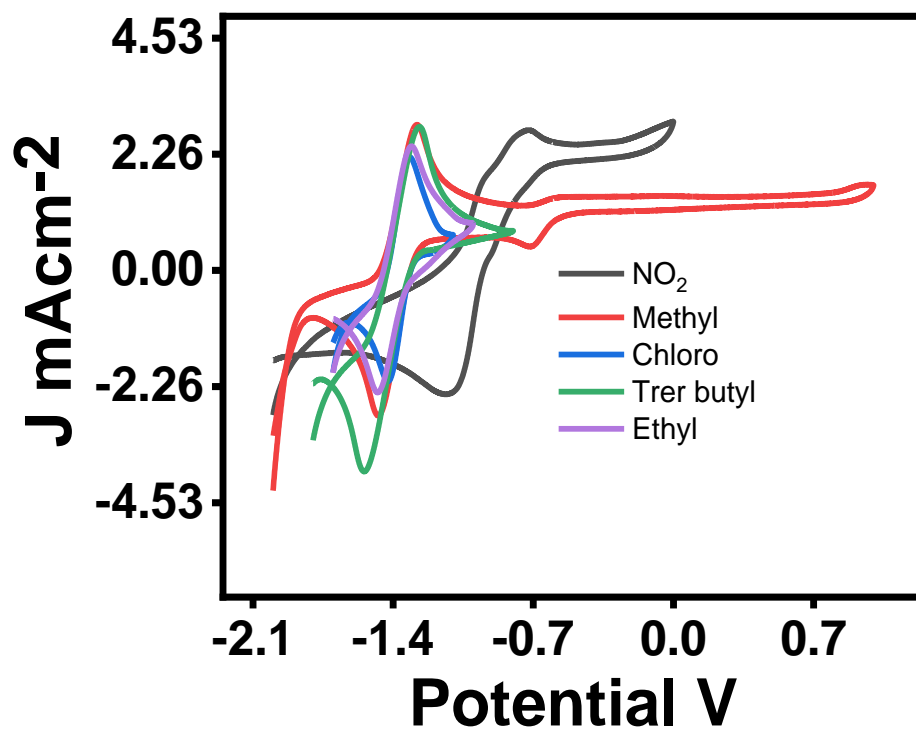

**Figure S16.** Voltammogram overlay of the synthesized derivatives.

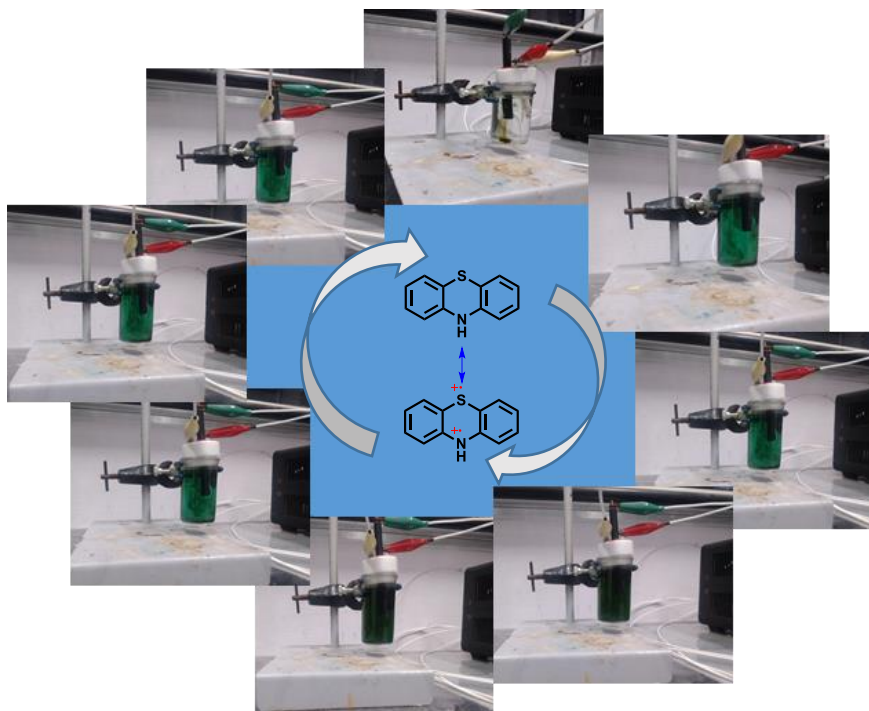

**Figure S17.** Optical images of the phenothiazine containing electrochemical cell showing the colour oscillatory reaction while redox chemistry.

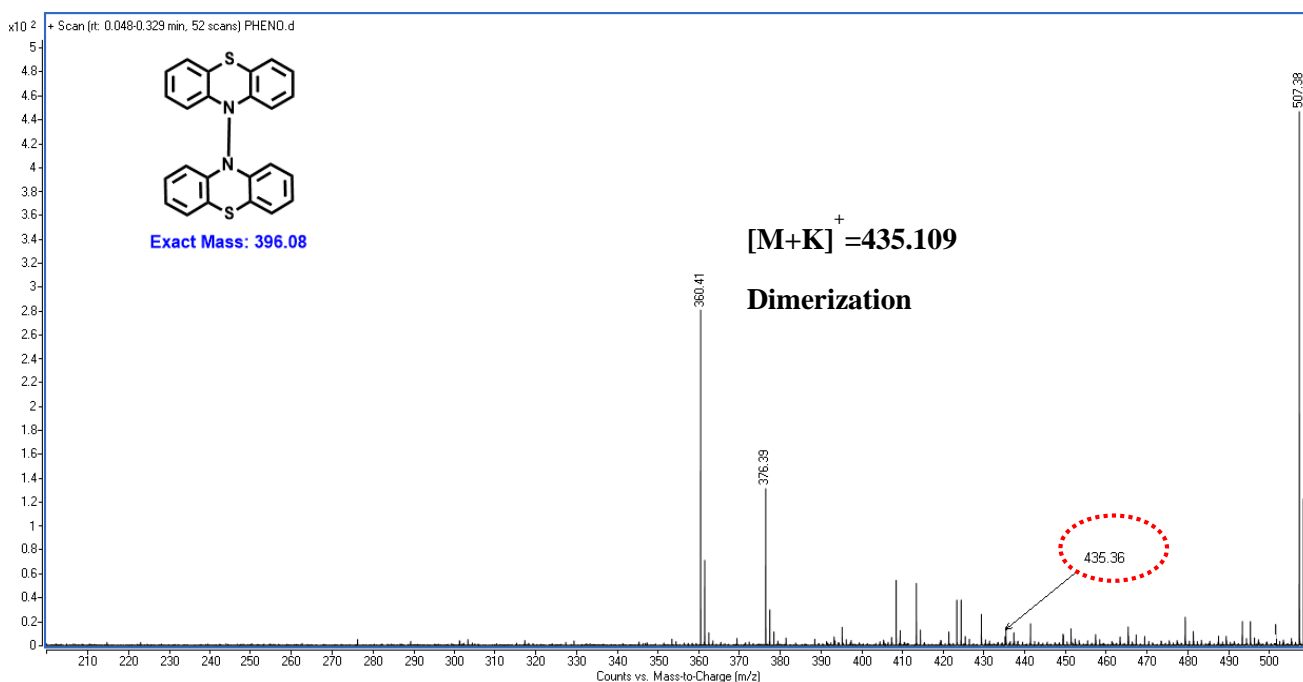

**Figure S18.** Mass profiling of the phenothiazine after battery study. Possible self-coupling as well as the corresponding base peaks were noted.

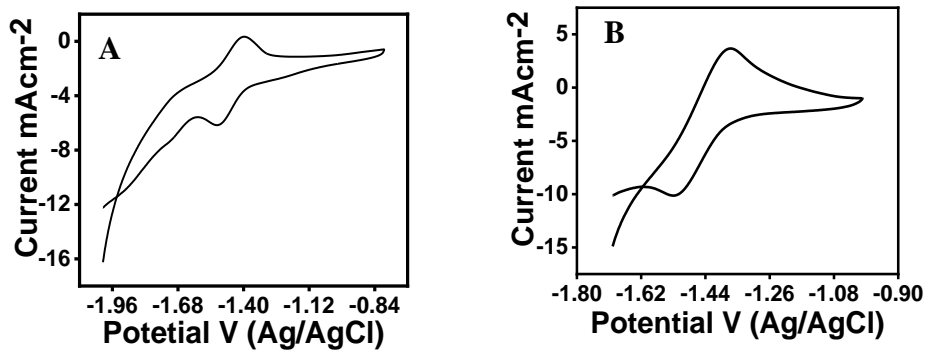

**Figure S19.** Cyclic voltammogram of A) tert-butyl phthalimide, B) 2ethyl-phthalimide after cycling experiment.
